# Supplementary material
Source: PubMed Central journal article supplement (PMC4209916)
Supplement: NIHMS579672-supplement-Supplemental_Data.pdf [file NIHMS579672-supplement-Supplemental_Data.pdf]

1 **eFIGURE 1: Percent of patients in Massachusetts who obtained free care for discretionary**  
2 **and non-discretionary surgery, 2003-2010**

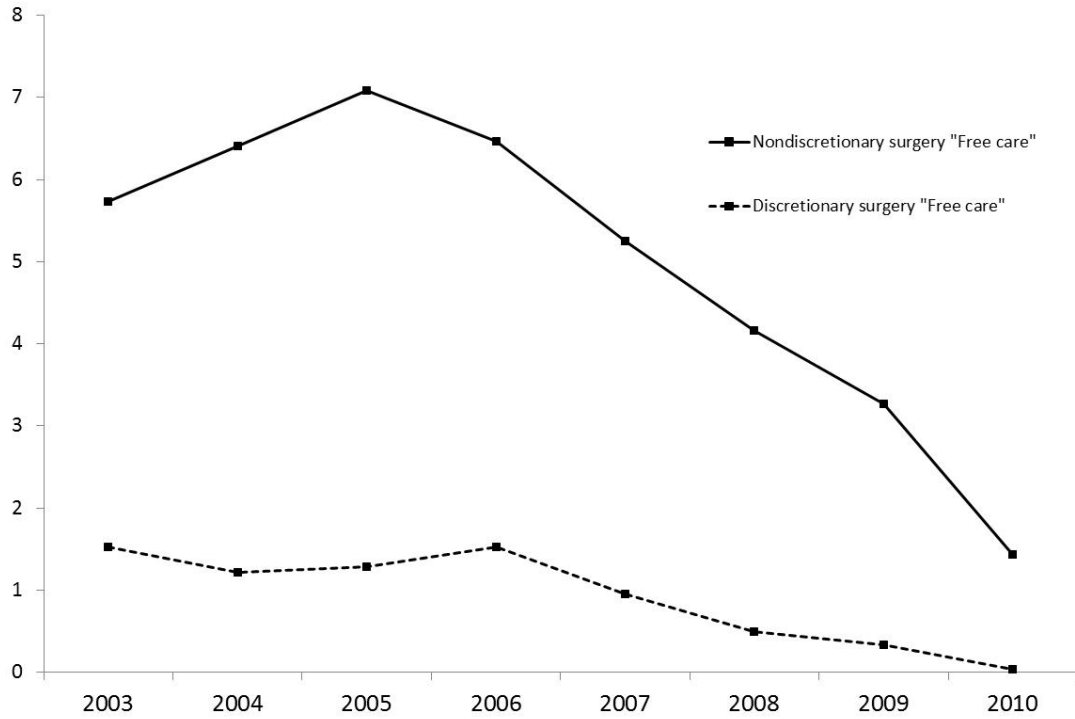

24 Figure shows the percent of patients in Massachusetts who underwent discretionary and non-  
25 discretionary surgery whose primary payer was listed as “no charge” in the Massachusetts State  
26 Inpatient Database.

27 **eTABLE 1: Diagnostic and procedure codes used to identify discretionary and non-**  
 28 **discretionary surgeries**  
 29

|                                          | ICD-9-CM Procedure code                                                                       | ICD-9-CM Diagnosis code (if applicable)             | Reference (if applicable) |
|------------------------------------------|-----------------------------------------------------------------------------------------------|-----------------------------------------------------|---------------------------|
| <b><i>Discretionary</i></b>              |                                                                                               |                                                     |                           |
| <b>Knee replacement*</b>                 | 81.54, 81.55                                                                                  | N/A                                                 | Birkmeyer                 |
| <b>Inguinal hernia repair*</b>           | 53.0, 53.1, 53.17                                                                             | N/A                                                 | N/A                       |
| <b>Transurethral resection prostate*</b> | 60.2, 60.29                                                                                   | N/A                                                 | N/A                       |
| <b>Hip replacement*</b>                  | 79.10, 79.15, 79.30, 79.35, 78.55, 81.51, 81.52                                               | (Excluding) 820, 820.3, 820.31, 820.32, 820.8 820.9 | Birkmeyer                 |
| <b>Back surgery*</b>                     | 03.0, 03.1, 03.2, 03.21, 03.4 03.5, 80.5, 80.50,81.0, 03.01-03.09, 80.50 -80.59, 81.00- 81.08 | N/A                                                 | Birkmeyer                 |
| <b><i>Non-discretionary</i></b>          |                                                                                               |                                                     |                           |
| <b>Hip fracture repair</b>               | 79.10, 79.15, 79.30, 79.35, 78.55, 81.51, 81.52                                               | 820, 820.3, 820.31, 820.32, 820.8 820.9             | Birkmeyer                 |
| <b>Appendectomy</b>                      | 47.0, 47.01, 47.09                                                                            | N/A                                                 | Livingston                |
| <b>Radical cystectomy</b>                | 57.71                                                                                         | 188, 1880-1889                                      | Begg                      |
| <b>Esophagectomy</b>                     | 424, 424.0, 424.1, 424.2                                                                      | 150, 150.0-150.9                                    | Begg                      |
| <b>Nephrectomy, Partial Nephrectomy</b>  | 554 , 555, 555.1, 555.2                                                                       | 189, 189.0, 189.1, 189.8, 189.9                     | Begg                      |
| <b>Pancreatectomy</b>                    | 526, 527, 525.1, 525.2, 525.3, 524.9                                                          | 157, 1570-1579                                      | Begg                      |
| <b>Colectomy</b>                         | 457, 458, 485, 486, 4571-4583, 4861-4869                                                      | 153, 154, 1530-1539, 1540-1548                      | Begg                      |
| <b>Lung surgery</b>                      | 32, 322-325, 3220-3259                                                                        | 162, 1620-1629                                      | Begg                      |
| <b>Uterine surgery</b>                   | 683, 689, 6830-6879                                                                           | 182, 1820-1828                                      | N/A                       |

30 \*Emergent cases excluded.

31 **References**

- 32 1. Birkmeyer JD, Sharp SM, Finlayson SR, Fisher ES, Wennberg JE. Variation profiles of  
 33 common surgical procedures. *Surgery*. 1998;124(5):917–23  
 34 2. Begg CB, Cramer LD, Hoskins WJ, Brennan MF. Impact of hospital volume on operative  
 35 mortality for major cancer surgery. *JAMA*. 1998;280(20):1747–51.  
 36 3. Livingston EH, Fairlie RW. Little effect of insurance status or socioeconomic condition  
 37 on disparities in minority appendicitis perforation rates. *Arch. Surg*. 2012;147(1):11–7.

38  
39  
40

**eTable 2: Net change in the rates of discretionary and non-discretionary surgery resulting from Massachusetts healthcare reform**

|                          | All         |         |         | White         |         |         | Non-white   |         |         |
|--------------------------|-------------|---------|---------|---------------|---------|---------|-------------|---------|---------|
|                          | coefficient | p-value | %change | coefficient   | p-value | %change | coefficient | p-value | %change |
| <b>Discretionary</b>     | 0.83        | 0.02    | 9.3%    | 0.95          | 0.003   | 10.6%   | 0.87        | <0.001  | 19.9%   |
| <b>Non-discretionary</b> | -0.21       | 0.01    | -4.5%   | -0.09         | 0.14    | -2.2%   | 0.15        | 0.40    | 3.9%    |
|                          | Low income  |         |         | Newly insured |         |         |             |         |         |
|                          | coefficient | p-value | %change | coefficient   | p-value | %change |             |         |         |
| <b>Discretionary</b>     | 0.60        | 0.004   | 6.7%    | 0.86          | 0.02    | 10.6%   |             |         |         |
| <b>Non-discretionary</b> | -0.36       | <0.001  | -6.3%   | -0.32         | <0.001  | -6.9%   |             |         |         |

41  
42  
43  
44  
45  
46  
47  
48

Results of the multivariable difference-in-differences (DID) analysis showing change in rates of discretionary and non-discretionary surgery in Massachusetts compared to control states. Reform transition point is defined as July 2007. Coefficient refers to the DID estimator and % change refers to coefficient divided by pre-reform rate. Low income refers to patients residing in Massachusetts counties with low median income. Newly insured refers to patients residing in Massachusetts counties with high numbers of individuals gaining insurance from 2006-2008.

49 **eTABLE 3: Net change in rate of discretionary and non-discretionary surgery, sensitivity**  
 50 **analysis with entire reform period removed**  
 51

|                          | All         |         |         | White         |         |         | Non-white   |         |         |
|--------------------------|-------------|---------|---------|---------------|---------|---------|-------------|---------|---------|
|                          | coefficient | p-value | %change | coefficient   | p-value | %change | coefficient | p-value | %change |
| <b>Discretionary</b>     | 0.91        | 0.02    | 10%     | 0.93          | 0.005   | 10%     | 0.78        | <0.001  | 18%     |
| <b>Non-discretionary</b> | -0.19       | 0.03    | -4%     | -0.17         | 0.01    | -4%     | -0.07       | 0.71    | -2%     |
|                          | Low income  |         |         | Newly insured |         |         |             |         |         |
|                          | coefficient | p-value | %change | coefficient   | p-value | %change |             |         |         |
| <b>Discretionary</b>     | 0.74        | 0.001   | 8%      | 1.05          | 0.006   | 13%     |             |         |         |
| <b>Non-discretionary</b> | -0.41       | <0.001  | -7%     | -0.34         | 0.001   | -6%     |             |         |         |

52 Results of the multivariable difference-in-differences analysis showing change in rates of  
 53 discretionary and non-discretionary surgery in Massachusetts compared to control states. In this  
 54 sensitivity analysis, we removed the entire reform period from January 2006 through June 2007.  
 55 Coefficient refers to the DID estimator and % change refers to coefficient divided by pre-reform  
 56 rate. Low income refers to patients residing in Massachusetts counties with low median income.  
 57 Newly insured refers to patients residing in Massachusetts counties with high numbers of  
 58 individuals gaining insurance from 2006-2008.  
 59  
 60  
 61

62 **eTABLE 4: Net change in rate of discretionary and non-discretionary surgery, sensitivity**  
 63 **analysis with nonelderly Medicare patients removed**  
 64

|                          | All         |         |         | White         |         |         | Non-white   |         |         |
|--------------------------|-------------|---------|---------|---------------|---------|---------|-------------|---------|---------|
|                          | coefficient | p-value | %change | coefficient   | p-value | %change | coefficient | p-value | %change |
| <b>Discretionary</b>     | 0.67        | 0.03    | 8.3%    | 0.80          | 0.004   | 9.8%    | 0.65        | 0.001   | 17.8%   |
| <b>Non-discretionary</b> | -0.23       | 0.002   | -5.1%   | -0.12         | 0.07    | -3.0%   | 0.13        | 0.43    | 3.6%    |
|                          | Low income  |         |         | Newly insured |         |         |             |         |         |
|                          | coefficient | p-value | %change | coefficient   | p-value | %change |             |         |         |
| <b>Discretionary</b>     | 0.36        | 0.05    | 4.6%    | 0.72          | 0.02    | 9.7%    |             |         |         |
| <b>Non-discretionary</b> | -0.39       | <0.001  | -7.3%   | -0.33         | <0.001  | -7.5%   |             |         |         |

65  
 66 Results of the multivariable difference-in-differences analysis showing change in rates of  
 67 discretionary and non-discretionary surgery in Massachusetts compared to control states. In this  
 68 sensitivity analysis, we removed all non-elderly patients who were still covered by Medicare.  
 69 Reform transition point is defined as July 2007. Coefficient refers to the DID estimator and %  
 70 change refers to coefficient/pre-reform rate. Low income refers to patients residing in  
 71 Massachusetts counties with low median income. Newly insured refers to patients residing in  
 72 Massachusetts counties with high numbers of individuals gaining insurance from 2006-2008.  
 73

74  
75  
76  
77

**eTABLE 5: Net change in rate of discretionary surgery, sensitivity analysis with inguinal hernia repair removed**

|                              | All         |         |         | White         |         |         | Non-white   |         |         |
|------------------------------|-------------|---------|---------|---------------|---------|---------|-------------|---------|---------|
|                              | coefficient | p-value | %change | coefficient   | p-value | %change | coefficient | p-value | %change |
| <b>Discretionary, no IHR</b> | 0.77        | 0.03    | 8.7%    | 0.92          | 0.006   | 10.4%   | 0.82        | <0.001  | 19.1%   |
|                              | Low income  |         |         | Newly insured |         |         |             |         |         |
|                              | coefficient | p-value | %change | coefficient   | p-value | %change |             |         |         |
| <b>Discretionary, no IHR</b> | 0.54        | 0.008   | 6.1%    | 0.81          | 0.03    | 10.1%   |             |         |         |

78  
79  
80  
81  
82  
83  
84  
85  
86  
87  
88  
89

Results of the multivariable difference-in-differences analysis showing change in rates of discretionary in Massachusetts compared to control states. In this sensitivity analysis, we removed inguinal hernia repair (IHR). From 2003-2010, there was a decline in the absolute number of inpatient surgeries performed, likely representing a secular shift towards the use of the outpatient setting for this procedure. Reform transition point is defined as July 2007. Coefficient refers to the DID estimator and % change refers to coefficient/pre-reform rate. Low income refers to patients residing in Massachusetts counties with low median income. Newly insured refers to patients residing in Massachusetts counties with high numbers of individuals gaining insurance from 2006-2008.

90 **eTABLE 6: Net change in rates of discretionary and non-discretionary surgery in each**  
 91 **year from 2004-2010**  
 92

|           | Discretionary |         | Non-discretionary |         |
|-----------|---------------|---------|-------------------|---------|
|           | coefficient   | p-value | coefficient       | p-value |
| July 2004 | -0.17         | 0.81    | 0.19              | 0.32    |
| July 2005 | -0.20         | 0.78    | 0.10              | 0.60    |
| July 2006 | -0.18         | 0.80    | -0.02             | 0.94    |
| July 2007 | 0.13          | 0.85    | -0.11             | 0.59    |
| July 2008 | 0.65          | 0.37    | -0.14             | 0.49    |
| July 2009 | 0.85          | 0.24    | 0.04              | 0.83    |
| July 2010 | 0.91          | 0.21    | -0.12             | 0.54    |

93  
 94 Results of the multivariable difference-in-differences (DID) analysis showing change in rates of  
 95 discretionary and non-discretionary surgery in Massachusetts compared to control states. For this  
 96 sensitivity analysis, we performed a DID analysis for each individual year regardless of reform  
 97 status (placebo analysis). Using 2003 as the reference year, we estimated the change in surgery  
 98 rates in Massachusetts relative to the control states for each year.

99  
 100  
 101

102 **eTABLE 7: Estimated number of additional discretionary procedures with national**  
 103 **insurance expansion**  
 104

| Number of newly insured (%) | Estimated number of additional discretionary surgeries |
|-----------------------------|--------------------------------------------------------|
| 25,000,000 (100)            | 465,934                                                |
| 18,750,000 (75)             | 349,451                                                |
| 12,500,000 (50)             | 232,967                                                |
| 6,250,000 (25)              | 116,484                                                |
| 2,500,000 (10)              | 46,493                                                 |
| 1,250,000 (5)               | 23,297                                                 |
| 250,000 (1)                 | 4,659                                                  |

105  
 106 Number of newly insured is based on Congressional Budget Office (CBO) estimates. Estimated  
 107 number of additional discretionary surgeries is based on increase in discretionary surgeries  
 108 observed in Massachusetts after insurance expansion. To arrive at national estimates we first  
 109 calculated the number of additional discretionary procedures that were performed in  
 110 Massachusetts using the coefficient from our difference-in-differences analysis (eTable 2).

111  
 112  $((\text{DID coefficient}) \times (4 \text{ quarters})) / 10,000 = \text{number of new procedures per person (NPP)}$   
 113  $(0.83 \times 4) / 10,000 = 0.000332$   
 114

115 We then multiplied the NPP by the total population of Massachusetts to arrive at the total  
 116 number of new procedures.

117  
 118  $\text{NPP} \times \text{population of MA} = \text{number of procedures (NP)}$   
 119  $0.000332 \times 6,634,906 = 2,203$   
 120

121 We then used the Census Small Area Insurance Estimates to identify the number of individuals  
 122 who gained insurance from 2006 to 2008 (n=118,192). We made the assumption that 100% of  
 123 the additional procedures were due to newly insured individuals (i.e., no change in rate of  
 124 surgery for those who already had insurance). Using this assumption, we calculated the  
 125 percentage of newly insured patients who received a discretionary surgery.

126  
 127  $\text{NP} / \text{number of newly insured} = \% \text{ of newly insured patients undergoing discretionary surgery}$   
 128  $2,203 / 118,192 = 1.86\%$   
 129

130 We used this figure and the CBO estimate of number of individuals who will gain insurance if  
 131 the insurance expansion provisions are fully implemented to arrive at our national estimates.  
 132  
 133  
 134
